# Supplementary material
Source: PubMed Central journal article supplement (PMC11309327)
Supplement: NIHPP2024.01.25.577216v2-supplement-1.pdf [file NIHPP2024.01.25.577216v2-supplement-1.pdf]

## Extended Data

### Supplementary Figures 1-6

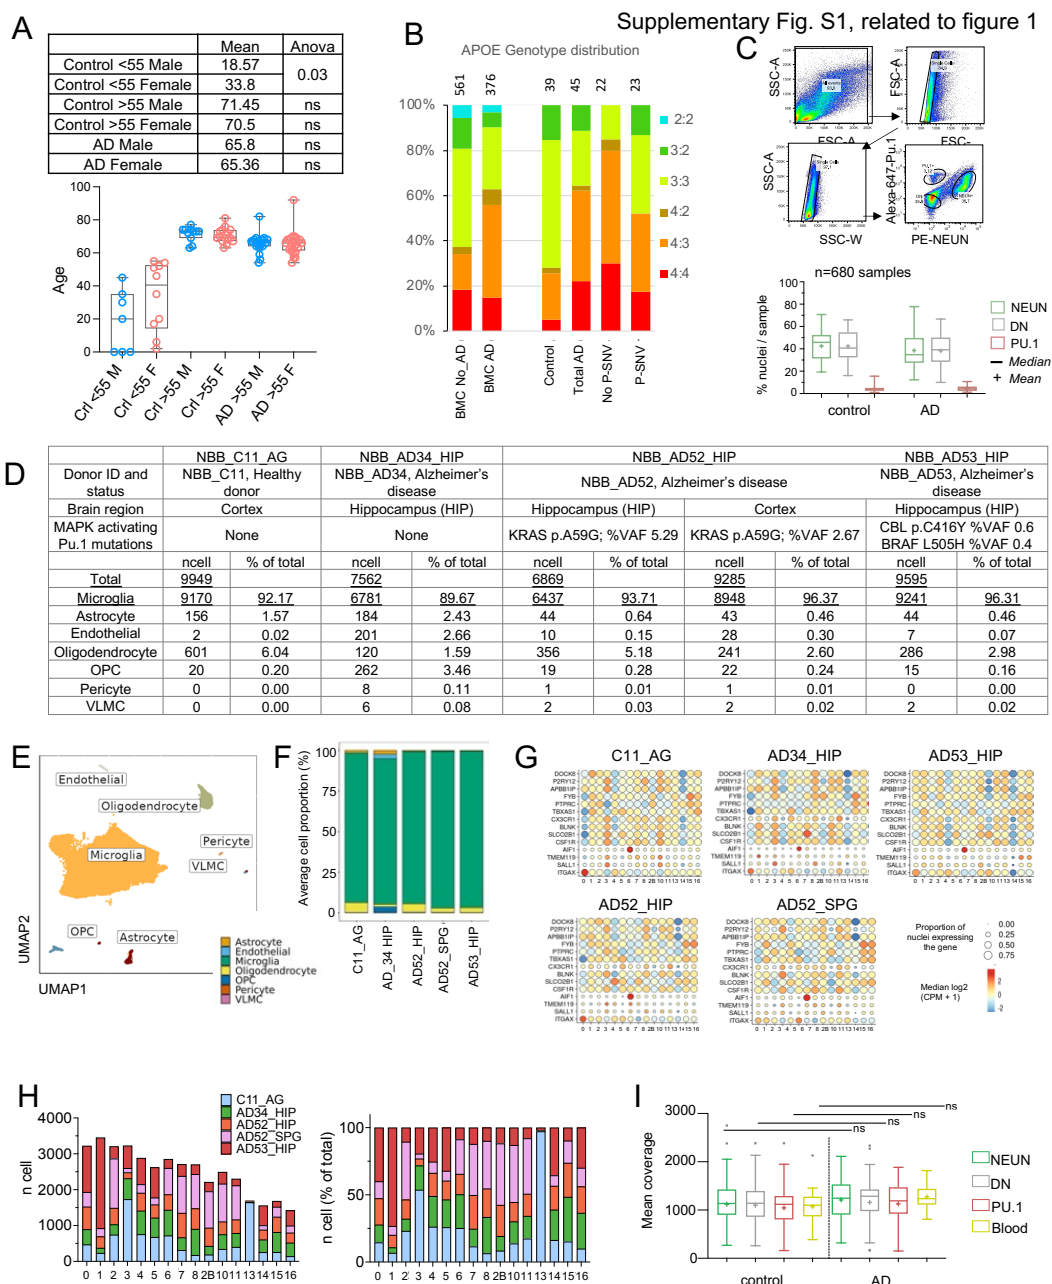

**Supplementary Figure 1. Quality control for DNA analysis and snRNAseq. (A) patients characteristic:** age and sex distribution of young controls, age-matched controls and AD patients, Statistics: 2 way Anova. **(B)** Distribution of APOE genotype in a historical cohort of controls and AD patients<sup>49</sup> (Left) and the present series (Right) of Control, AD and AD without and with pathogenic (P-SNV) microglia variants. Numbers on top of the bars show patient number in each group. **(C)** Sorting strategy to separate PU.1+, NEUN+ and DN nuclei from post-mortem brain samples. Boxplot represents relative frequencies, median, mean, 25-75<sup>th</sup> quartiles (boxes) and minimum/maximum (whiskers) of nuclei for each cell type in controls (n=63 brain samples) and AD patients (n=99 brain samples). **(D)** SnRNA-seq analysis of Facs-sorted PU.1+ nuclei from 4 donors. Table indicate donor characteristics, number of nuclei

analyzed after quality control (see methods) and cell types as determined by unsupervised clustering of normalized and integrated gene expression of nuclei from 5 PU.1<sup>+</sup> samples. **(E)** UMAP representation of cell types from (C). **(E)** Cell proportion plot of the 5 PU.1<sup>+</sup> samples from (C). **(F)** Boxplot showing the coverage of targeted DNA deep sequencing per cell type in AD and control samples. Box plots show median (+ mean) and 25th and 75th percentiles; whiskers extend to the largest and smallest values. Dots show outliers. **(G)** Expression of microglia markers by sn-RNAseq across samples and clusters. **(H)** Number (TOP) and proportion (BOTTOM) of cells from each sample, per-cluster. **(I)** Boxplot showing the coverage of targeted DNA deep sequencing per cell type in AD and control samples. Box plots show median (+ mean) and 25th and 75th percentiles; whiskers extend to the largest and smallest values. Dots show outliers.

Supplementary Fig. S2, related to figure 2

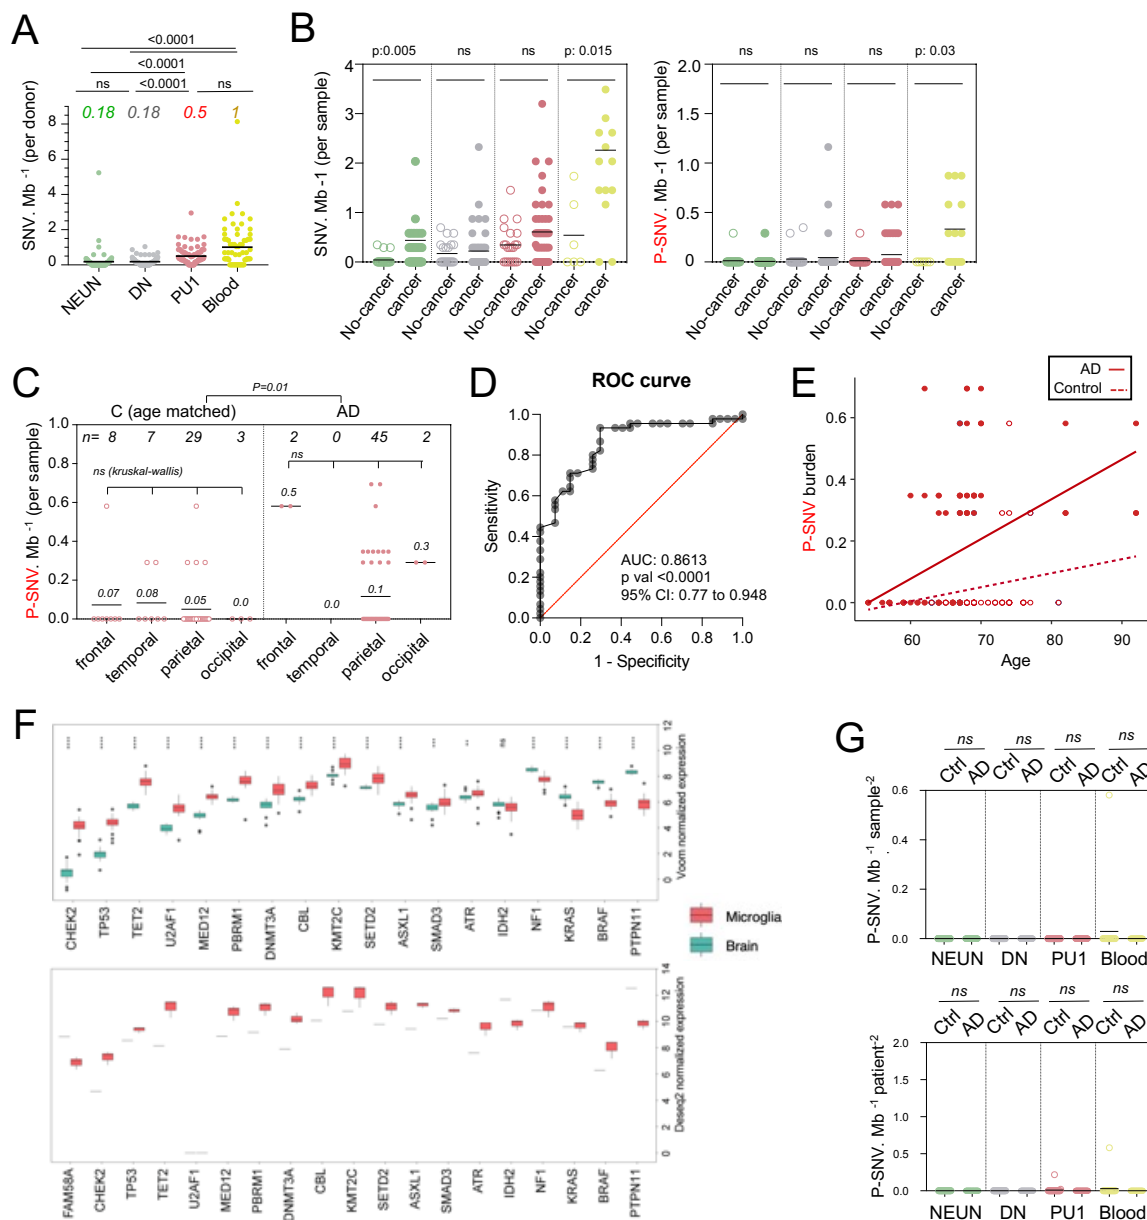

**Supplementary Figure 2. Analysis of pathogenic variants.** (A) Number of SNV per Mb, per donor, and cell types. Each dot represents the mean of a donor. NeuN  $n=226$ , DN  $n=229$ , PU.1  $n=225$ , Blood  $n=66$ ). Values (color, *italics*) indicate the mean number of variants /Mb per cell type. Statistics:  $p$ -value are calculated by Kruskal–Wallis test and Dunn's test for multiple comparisons. (B) Number of SNV (Left) and P-SNV (right) per Mb in controls (age-matched with the patients) with or without cancer per sample and cell types. Each dot represents a sample. Statistics:  $p$ -values within each group are calculated with Kruskal–Wallis, multiple comparisons. (C) Number of SNV per Mb in PU.1 samples across cortical samples, of age-matched controls ( $n=27$ ) and AD patients ( $n=45$ ). Each dot represents a sample. Statistics:  $p$ -values within each group are calculated with Kruskal–Wallis, multiple comparisons. (D) Receiver operating characteristic (ROC) curve showing the accuracy of the multivariate logistic regression model in predicting the association of AD and the presence or not of pathogenic variants in PU.1<sup>+</sup> nuclei. Note: non-parametric tests were used as data did not follow a normal distribution (D'Agostino-Pearson normality test). (E) Observed SNV burden for Fig. 2H. (F) Expression of pathogenic genes in microglia and whole brain tissue,



Supplementary Fig. S4, related to Figure 3

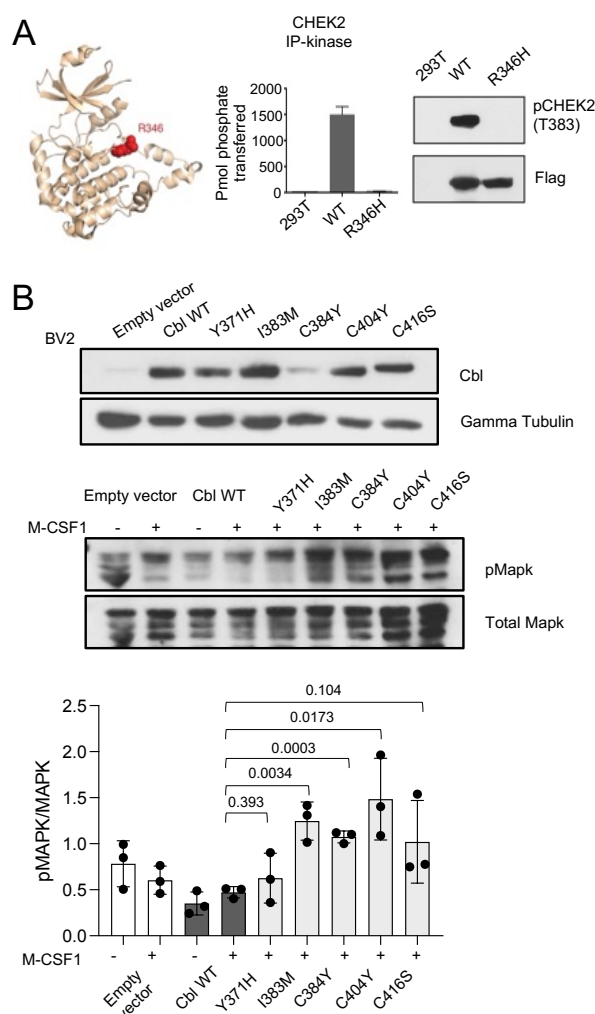

### Supplementary Figure 4. Functional analysis of variants in HEK293 and BV2 cell lines

**(A)** Quantification of Western blot from cell lysates from HEK293T cells expressing WT or mutant CBL alleles and stimulated with EGF or control were probed with antibodies against Phospho-p44/42 MAPK (Erk 1/2, Thr202/Tyr204, (pMAPK)), total MAPK (p44/42 MAPK, Erk1/2, (MAPK)), and HA-tag (BOTTOM).  $n=4$  independent experiments. Statistic: Student t-test. **(B)** HEK293T cells expressing Flag-RIT1 (WT and mutants) were treated +/- 20% FBS before harvesting and Lysates were probed with antibodies against Phospho-p44/42 MAPK (Erk 1/2, Thr202/Tyr204, (pMAPK)), total MAPK (p44/42 MAPK, Erk1/2, (MAPK)), and Flag.  $n=5$  independent experiments. Statistic: Student t-test. **(C)** Flag-tagged RIT1 constructs were expressed in HEK293T cells. Lysates were used in pulldown reactions with immobilized GST-PAK1-CRIB domain and in immunoprecipitation reactions with Cdc42 antibody. Bound RIT1 was measured by anti-Flag Western blotting. Lysates were also analyzed by anti-Flag and anti-MAPK Western blotting. **(D)** CHEK2 R346H is a

loss-of-function mutant. The R346H variant is located within the catalytic loop of the protein kinase domain and shown in red on the 3D structure of CHEK2 kinase domain (pdb code: 2cn5) (LEFT). CHEK2 R346 Lysates from HEK293T cells expressing Flag-WT or CHEK2 R346 were probed with antibodies that recognizes the auto phosphorylated and activated form of CHEK2 and Flag (MIDDLE). Flag-tagged WT and R346H CHK2 were expressed in HEK293T cells, proteins were isolated by immunoaffinity capture using anti-Flag resin. CHK2 activity was measured with [ $^{32}$ P]-labeled ATP and a synthetic CHEK2 substrate peptide. Wild-type CHEK2 showed robust activity, while the R346H mutant was inactive (RIGHT). **(E)** Western-blot analysis of CBL expression (TOP), pMAPK and total MAPK (MIDDLE) and respective quantification (BOTTOM) in BV2 cell lines transduced with empty vector, CBL<sup>WT</sup>, CBL<sup>Y371H</sup>, CBL<sup>I383M</sup>, CBL<sup>C384Y</sup>, CBL<sup>C404Y</sup> and CBL<sup>C416S</sup>. For MIDDLE panel, cells were treated with M-CSF1 100 ng/ml for 5 min. Statistics:  $p$ -values are calculated with t-test.  $n=3$ .

## Supplementary Fig. S5, related to figure 4

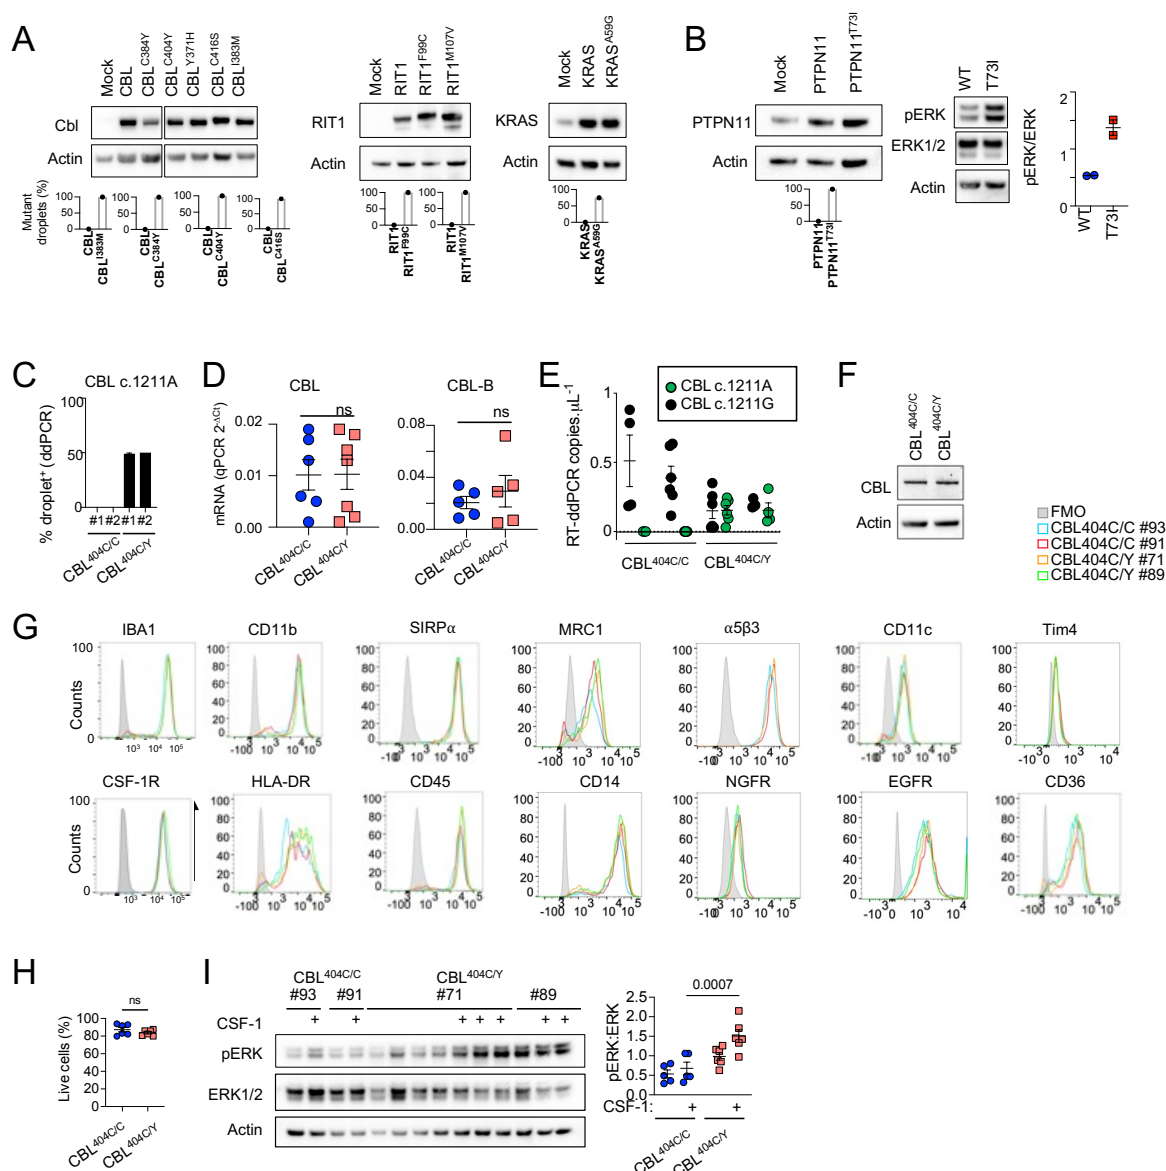

**Supplementary Figure 5. Analysis of mouse and human microglia-like cells. (A)** Western-blot analysis of CBL, RIT1, and KRAS expression in lysates from a growth factor-dependent macrophage cell line expressing CBL<sup>WT</sup>, CBL<sup>I383M</sup>, CBL<sup>C384Y</sup>, CBL<sup>C404Y</sup>, CBL<sup>C416S</sup>, CBL<sup>R420Q</sup>, RIT1<sup>WT</sup>, RIT1<sup>F99C</sup>, RIT1<sup>M107V</sup>, KRAS<sup>WT</sup> and KRAS<sup>A59G</sup> alleles (TOP), and ddPCR analysis of wt and mutant alleles in DNA from the same cell lines (BOTTOM). **(B)** Western-blot analysis of PTPN11 expression and phospho- and total-ERK in lysates from growth factor-dependent macrophage cell line expressing PTPN11<sup>WT</sup> or PTPN11<sup>T73I</sup> alleles, and ddPCR analysis of wt and variant alleles in DNA from the same lines. **(C)** Genomic DNA ddPCR of 2 independent hiPSC clones (#1 and #2) of CBL<sup>404C/Y</sup> heterozygous mutant carrying the c.1211G/A transition on one allele and 2 independent isogenic control CBL<sup>404C/C</sup> clones all obtained by prime editing. **(D)** CBL and CBL-B mRNA expression assessed by Taqman assay in CBL<sup>404C/C</sup> and CBL<sup>404C/Y</sup> iPSC-derived microglia-like cells. Unpaired t-test. **(E)** RT-ddPCR of CBL reference allele (CBL c.1211A) and CBL variant CBL c.1211G transcripts in CBL<sup>404C/C</sup> and CBL<sup>404C/Y</sup> iPSC-derived macrophages. n=4-6 independent experiments. **(F)** Western-blot analysis of CBL expression in lysates from CBL<sup>404C/C</sup> and CBL<sup>404C/Y</sup> iPSC-derived microglia-like cells. **(G)** Representative flow cytometry analysis of the expression of surface receptors

and Iba1 in CBL<sup>404C/C</sup> and CBL<sup>404C/Y</sup> cells (n=3) **(H)** Viability of CBL<sup>404C/C</sup> and CBL<sup>404C/Y</sup> iPSC-derived microglia-like cells estimated by flow cytometry analysis after DAPI staining. Unpaired t-test. n=6. **(I)** Western-blot analysis and quantification of phospho- and total-ERK proteins in lysates from CBL<sup>404C/C</sup> and CBL<sup>404C/Y</sup> iPSC-derived microglia-like cells untreated or re-stimulated with CSF-1 cells (5 min, 100 ng/mL). (Two-way ANOVA, n=6-7).

## A

### Supplementary Fig. S6, related to figure 5

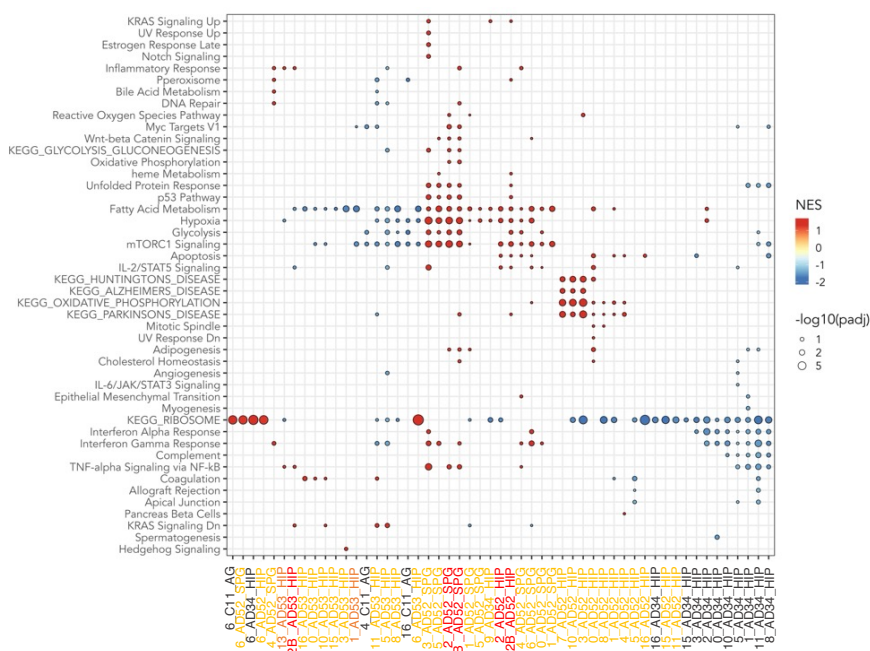

## B

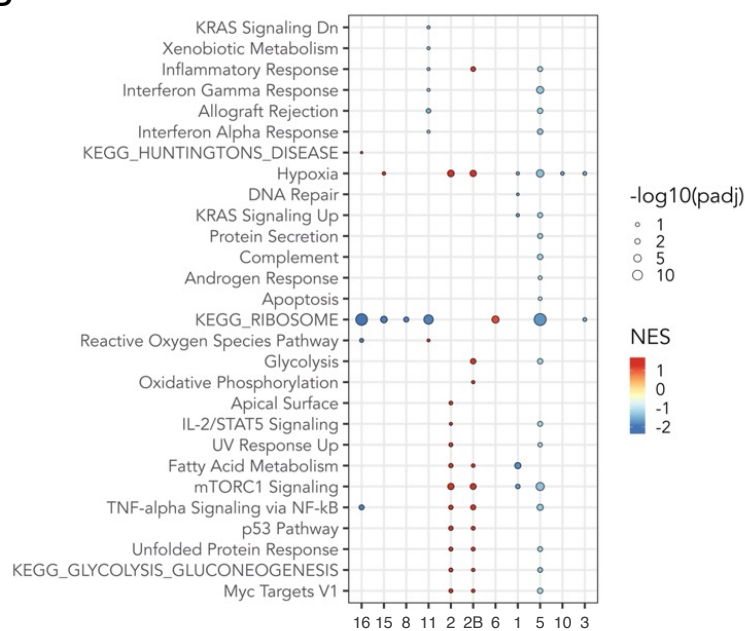

**Supplementary Figure 6. snRNAseq analysis of microglia. (A)** Dot plot represents the significant pathways by GSEA analysis of HALLMARK and KEGG pathways of snRNAseq analysis of microglia, by samples and clusters. Genes from all samples are pre-ranked per cluster using differential expression analysis with SCANPY<sup>37</sup> and the Wilcoxon rank-sum method. Statistical analysis were performed using the `fgseaMultilevel` function in `fgsea` R package<sup>38</sup> or HALLMARK and KEGG pathways. Only HALLMARK and KEGG gene sets with  $p$ -value  $< 0.05$  and adjusted  $p$ -value  $< 0.25$  are visualized, using `ggpubr` and `ggplot2`<sup>39</sup> R package. **(B)** Dot plot represents the same GSEA analysis of HALLMARK and KEGG pathways enriched in snRNAseq microglia clusters as in A, but samples from all donors are grouped by microglia clusters.



**Supplemental Tables 1-9:****Supplementary Table 1:** Characteristics of AD and control donors and samples**Supplementary Table 2:** Targeted-Sequencing gene panel**Supplementary Table 3:** Variants identified in Alzheimer's disease and control brain samples.**Supplementary Table 4:** Pathway enrichment analysis for genes target of pathogenic variants in PU.1 samples.**Supplementary Table 5:** BRAFV600E in brain PU.1+ cells from Histiocytosis patients**Supplementary Table 6:** Predicted deleterious variants by WES**Supplementary Table 7:** RNAseq analysis of mouse cell lines: Differential expressed genes and GSEA analysis.**Supplementary Table 8:** RNAseq analysis of hiPSC derived microglial-like cells: Differential expressed genes and GSEA analysis.**Supplementary Table 9:** Single nuclei RNAseq analysis of control and AD microglia: Differential expressed genes per clusters and GSEA analysis.**Supplemental References**

- 1 Dubois, B. *et al.* Research criteria for the diagnosis of Alzheimer's disease: revising the NINCDS-ADRDA criteria. *Lancet Neurol* **6**, 734-746 (2007). [https://doi.org:10.1016/S1474-4422\(07\)70178-3](https://doi.org:10.1016/S1474-4422(07)70178-3)
- 2 Braak, H. & Braak, E. Neuropathological staging of Alzheimer-related changes. *Acta Neuropathol* **82**, 239-259 (1991). <https://doi.org:10.1007/BF00308809>
- 3 Braak, H. & Braak, E. Staging of Alzheimer's disease-related neurofibrillary changes. *Neurobiol Aging* **16**, 271-278; discussion 278-284 (1995). [https://doi.org:10.1016/0197-4580\(95\)00021-6](https://doi.org:10.1016/0197-4580(95)00021-6)
- 4 McKhann, G., Drachman, D., Folstein, M., Katzman, R., Price, D. & Stadlan, E. M. Clinical diagnosis of Alzheimer's disease: report of the NINCDS-ADRDA Work Group under the auspices of Department of Health and Human Services Task Force on Alzheimer's Disease. *Neurology* **34**, 939-944 (1984). <https://doi.org:10.1212/wnl.34.7.939>
- 5 McKhann, G. M. *et al.* The diagnosis of dementia due to Alzheimer's disease: recommendations from the National Institute on Aging-Alzheimer's Association workgroups on diagnostic guidelines for Alzheimer's disease. *Alzheimers Dement* **7**, 263-269 (2011). <https://doi.org:10.1016/j.jalz.2011.03.005>
- 6 Cheng, D. T. *et al.* Memorial Sloan Kettering-Integrated Mutation Profiling of Actionable Cancer Targets (MSK-IMPACT): A Hybridization Capture-Based Next-Generation Sequencing Clinical Assay for Solid Tumor Molecular Oncology. *J Mol Diagn* **17**, 251-264 (2015). <https://doi.org:10.1016/j.jmoldx.2014.12.006>

- 7 Karch, C. M., Cruchaga, C. & Goate, A. M. Alzheimer's disease genetics: from the bench to the clinic. *Neuron* **83**, 11-26 (2014). <https://doi.org:10.1016/j.neuron.2014.05.041>
- 8 Karch, C. M. & Goate, A. M. Alzheimer's disease risk genes and mechanisms of disease pathogenesis. *Biol Psychiatry* **77**, 43-51 (2015). <https://doi.org:10.1016/j.biopsych.2014.05.006>
- 9 Turner, M. R. *et al.* Controversies and priorities in amyotrophic lateral sclerosis. *Lancet Neurol* **12**, 310-322 (2013). [https://doi.org:10.1016/s1474-4422\(13\)70036-x](https://doi.org:10.1016/s1474-4422(13)70036-x)
- 10 Bras, J., Guerreiro, R. & Hardy, J. Use of next-generation sequencing and other whole-genome strategies to dissect neurological disease. *Nat Rev Neurosci* **13**, 453-464 (2012). <https://doi.org:10.1038/nrn3271>
- 11 Renton, A. E., Chiò, A. & Traynor, B. J. State of play in amyotrophic lateral sclerosis genetics. *Nat Neurosci* **17**, 17-23 (2014). <https://doi.org:10.1038/nn.3584>
- 12 Ferrari, R. *et al.* A genome-wide screening and SNPs-to-genes approach to identify novel genetic risk factors associated with frontotemporal dementia. *Neurobiol Aging* **36**, 2904.e2913-2926 (2015). <https://doi.org:10.1016/j.neurobiolaging.2015.06.005>
- 13 Kouri, N. *et al.* Genome-wide association study of corticobasal degeneration identifies risk variants shared with progressive supranuclear palsy. *Nat Commun* **6**, 7247 (2015). <https://doi.org:10.1038/ncomms8247>
- 14 Scholz, S. W. & Bras, J. Genetics Underlying Atypical Parkinsonism and Related Neurodegenerative Disorders. *Int J Mol Sci* **16**, 24629-24655 (2015). <https://doi.org:10.3390/ijms161024629>
- 15 Nalls, M. A. *et al.* Large-scale meta-analysis of genome-wide association data identifies six new risk loci for Parkinson's disease. *Nat Genet* **46**, 989-993 (2014). <https://doi.org:10.1038/ng.3043>
- 16 Martincorena, I. *et al.* Tumor evolution. High burden and pervasive positive selection of somatic mutations in normal human skin. *Science* **348**, 880-886 (2015). <https://doi.org:10.1126/science.aaa6806>
- 17 Martincorena, I. *et al.* Somatic mutant clones colonize the human esophagus with age. *Science* **362**, 911-917 (2018). <https://doi.org:10.1126/science.aau3879>
- 18 Martincorena, I. & Campbell, P. J. Somatic mutation in cancer and normal cells. *Science* **349**, 1483-1489 (2015). <https://doi.org:10.1126/science.aab4082>
- 19 Reiner, A., Yekutieli, D. & Benjamini, Y. Identifying differentially expressed genes using false discovery rate controlling procedures. *Bioinformatics* **19**, 368-375 (2003). <https://doi.org:10.1093/bioinformatics/btf877>
- 20 Landrum, M. J. *et al.* ClinVar: public archive of relationships among sequence variation and human phenotype. *Nucleic Acids Res* **42**, D980-985 (2014). <https://doi.org:10.1093/nar/gkt1113>
- 21 Chakravarty, D. *et al.* OncoKB: A Precision Oncology Knowledge Base. *JCO Precis Oncol* **2017** (2017). <https://doi.org:10.1200/PO.17.00011>
- 22 Tidyman, W. E. & Rauen, K. A. Expansion of the RASopathies. *Curr Genet Med Rep* **4**, 57-64 (2016). <https://doi.org:10.1007/s40142-016-0100-7>
- 23 Rauen, K. A. The RASopathies. *Annu Rev Genomics Hum Genet* **14**, 355-369 (2013). <https://doi.org:10.1146/annurev-genom-091212-153523>
- 24 Zehir, A. *et al.* Mutational landscape of metastatic cancer revealed from prospective clinical sequencing of 10,000 patients. *Nat Med* **23**, 703-713 (2017). <https://doi.org:10.1038/nm.4333>

- 25 Bardou, P., Mariette, J., Escudie, F., Djemiel, C. & Klopp, C. jvenn: an interactive Venn diagram viewer. *BMC Bioinformatics* **15**, 293 (2014). <https://doi.org/10.1186/1471-2105-15-293>
- 26 Zhou, Y. *et al.* Metascape provides a biologist-oriented resource for the analysis of systems-level datasets. *Nat Commun* **10**, 1523 (2019). <https://doi.org/10.1038/s41467-019-09234-6>
- 27 Huang da, W., Sherman, B. T. & Lempicki, R. A. Systematic and integrative analysis of large gene lists using DAVID bioinformatics resources. *Nat Protoc* **4**, 44-57 (2009). <https://doi.org/10.1038/nprot.2008.211>
- 28 Huang da, W., Sherman, B. T. & Lempicki, R. A. Bioinformatics enrichment tools: paths toward the comprehensive functional analysis of large gene lists. *Nucleic Acids Res* **37**, 1-13 (2009). <https://doi.org/10.1093/nar/gkn923>
- 29 Ashburner, M. *et al.* Gene ontology: tool for the unification of biology. The Gene Ontology Consortium. *Nat Genet* **25**, 25-29 (2000). <https://doi.org/10.1038/75556>
- 30 The Gene Ontology, C. The Gene Ontology Resource: 20 years and still GOing strong. *Nucleic Acids Res* **47**, D330-D338 (2019). <https://doi.org/10.1093/nar/gky1055>
- 31 Schaefer, C. F. *et al.* PID: the Pathway Interaction Database. *Nucleic Acids Res* **37**, D674-679 (2009). <https://doi.org/10.1093/nar/gkn653>
- 32 Zar, J. *Biostatistical Analysis*: New Jersey: Prentice-Hall. 523 (2010).
- 33 Galatro, T. F. *et al.* Transcriptomic analysis of purified human cortical microglia reveals age-associated changes. *Nat Neurosci* **20**, 1162-1171 (2017). <https://doi.org/10.1038/nn.4597>
- 34 Gosselin, D. *et al.* An environment-dependent transcriptional network specifies human microglia identity. *Science* **356** (2017). <https://doi.org/10.1126/science.aal3222>
- 35 Love, M. I., Huber, W. & Anders, S. Moderated estimation of fold change and dispersion for RNA-seq data with DESeq2. *Genome Biol* **15**, 550 (2014). <https://doi.org/10.1186/s13059-014-0550-8>
- 36 Azizi, E. *et al.* Single-Cell Map of Diverse Immune Phenotypes in the Breast Tumor Microenvironment. *Cell* **174**, 1293-1308 e1236 (2018). <https://doi.org/10.1016/j.cell.2018.05.060>
- 37 Wolf, F. A., Angerer, P. & Theis, F. J. SCANPY: large-scale single-cell gene expression data analysis. *Genome biology* **19**, 15 (2018). <https://doi.org/10.1186/s13059-017-1382-0>
- 38 Korotkevich, G., Sukhov, V. & Sergushichev, A. Fast gene set enrichment analysis. *bioRxiv*, 060012 (2019). <https://doi.org/10.1101/060012>
- 39 Hadley, W. *ggplot2: Elegant Graphics for Data Analysis*. (Springer-Verlag New York, 2016).
- 40 Rogers, M. F., Shihab, H. A., Mort, M., Cooper, D. N., Gaunt, T. R. & Campbell, C. FATHMM-XF: accurate prediction of pathogenic point mutations via extended features. *Bioinformatics* **34**, 511-513 (2018). <https://doi.org/10.1093/bioinformatics/btx536>
- 41 Xiong, Y., Song, D., Cai, Y., Yu, W., Yeung, Y. G. & Stanley, E. R. A CSF-1 receptor phosphotyrosine 559 signaling pathway regulates receptor ubiquitination and tyrosine phosphorylation. *J Biol Chem* **286**, 952-960 (2011). <https://doi.org/10.1074/jbc.M110.166702>
- 42 Lachmann, N. *et al.* Large-scale hematopoietic differentiation of human induced pluripotent stem cells provides granulocytes or macrophages for cell replacement

- therapies. *Stem Cell Reports* **4**, 282-296 (2015).  
<https://doi.org:10.1016/j.stemcr.2015.01.005>
- 43 Lu, B. *et al.* A Transcription Factor Addiction in Leukemia Imposed by the MLL Promoter Sequence. *Cancer Cell* **34**, 970-981 e978 (2018).  
<https://doi.org:10.1016/j.ccell.2018.10.015>
- 44 Ng, P. K. *et al.* Systematic Functional Annotation of Somatic Mutations in Cancer. *Cancer Cell* **33**, 450-462 e410 (2018). <https://doi.org:10.1016/j.ccell.2018.01.021>
- 45 Kim, E. *et al.* Systematic Functional Interrogation of Rare Cancer Variants Identifies Oncogenic Alleles. *Cancer Discov* **6**, 714-726 (2016). <https://doi.org:10.1158/2159-8290.CD-16-0160>
- 46 Zafra, M. P. *et al.* Optimized base editors enable efficient editing in cells, organoids and mice. *Nat Biotechnol* **36**, 888-893 (2018). <https://doi.org:10.1038/nbt.4194>
- 47 Perez-Pinera, P. *et al.* RNA-guided gene activation by CRISPR-Cas9-based transcription factors. *Nat Methods* **10**, 973-976 (2013).  
<https://doi.org:10.1038/nmeth.2600>
- 48 Zhong, A., Li, M. & Zhou, T. Protocol for the Generation of Human Pluripotent Reporter Cell Lines Using CRISPR/Cas9. *STAR Protoc* **1** (2020).  
<https://doi.org:10.1016/j.xpro.2020.100052>
- 49 Sando, S. B. *et al.* APOE epsilon 4 lowers age at onset and is a high risk factor for Alzheimer's disease; a case control study from central Norway. *BMC Neurol* **8**, 9 (2008). <https://doi.org:10.1186/1471-2377-8-9>
- 50 Martin, P. M. *et al.* DIXDC1 contributes to psychiatric susceptibility by regulating dendritic spine and glutamatergic synapse density via GSK3 and Wnt/ $\beta$ -catenin signaling. *Molecular Psychiatry* **23**, 467-475 (2018).  
<https://doi.org:10.1038/mp.2016.184>
